# Supplementary material
Source: PubMed Central journal article supplement (PMC3923312)

## Supplementary method and materials

### Protein electrophoresis and immunoblotting

Expression of  $\gamma$ -glutamyl transferase (GGT), 5-oxoprolinase (OPLAH) and  $\gamma$ -glutamyl cysteine ligase catalytic unit (GCLC) in HT22, PC12 and primary cortical neuron cells was determined by immunoblotting. Cells were washed in PBS, scraped into phosphate lysis buffer with 0.5% N-lauroylsarcosine, sonicated, and cleared by centrifugation. Protein concentrations in the cell extracts were determined Bradford assay. 25  $\mu$ g of protein were solubilized in 1x NuPAGE LDS sample buffer (Invitrogen), electrophoresed on NuPAGE 4-12% Bis-Tris Gel and transferred to immobilon-P PVDF membrane (Millipore). The primary antibodies used were anti-GGT1 (Sigma WH0002678M1; 1:1000), anti-OPLAH (Abcam ab85215; 1:200), anti-GCLC (Abcam ab41463; 1:1000) and anti-human  $\beta$ -actin (Cell Signaling 4967; 1:1000). Secondary antibodies included horseradish peroxidase conjugated (HRP) anti-rabbit IgG (GE Healthcare NA934; 1:5000) for anti-OPLAH, anti-GCLC and anti-human  $\beta$ -actin, and HRP anti-mouse IgG (GE Healthcare NA931; 1:5000) for anti-GGT1. Blots were treated with SuperSignal West Pico Chemiluminescent Substrate (Thermo Fisher Scientific) and visualized with ImageQuant LAS-4000 mini (GE Healthcare). Protein expression was quantified with Image-J software (NIH, <http://rsb.info.nih.gov/ij/>) using  $\beta$ -actin as a control for normalization.

## Supplementary figure legends

Supplementary Fig. 1. The  $\gamma$ -glutamyl cycle (glutathione cycle). Glutamate is liberated from the cycle via OPLAH, and used as a substrate for glutathione synthesis by GCL. Inhibitor drugs (acivicin, 2I4C, and BSO) are shown with their respective targets. OPLAH, 5-oxoprolinase; GCL,  $\gamma$ -glutamyl cysteine ligase; 2I4C, 2-imidazolidone-4-carboxylate; BSO, buthionine sulfoximine.

Supplementary Fig. 2. Expression of  $\gamma$ -glutamyl transferase (GGT), 5-oxoprolinase (OPLAH) and  $\gamma$ -glutamyl cysteine ligase catalytic subunit (GCLC) in HT22 and PC12 cells. 25 ug of protein was immunoblotted for each sample.

Supplementary Fig. 3. Acivicin increases  $\gamma$ -glutamyl cysteine ligase catalytic subunit (GCLC) expression in PC12 cells. (A,B) Immunoblots of GCLC and  $\beta$ -actin expression in HT22 and PC12 cells treated with acivicin for 24 hours. 25 ug of protein was loaded in each lane, and blots were probed with anti-GCLC (73kDa) and anti- $\beta$ -actin (45kDa) antibodies. (C,D) Acivicin increases GCLC expression in PC12 cells. Relative expression was determined by normalization of density of GCLC protein bands to that of  $\beta$ -actin of the same blot. Data represent mean  $\pm$  standard error of triplicates, representative of 3 independent experiments. \*,  $p < 0.05$  by 1-way ANOVA with Tukey-Kramer post hoc test.

# Supplementary Fig. 1 - Glutathione cycle and inhibitors

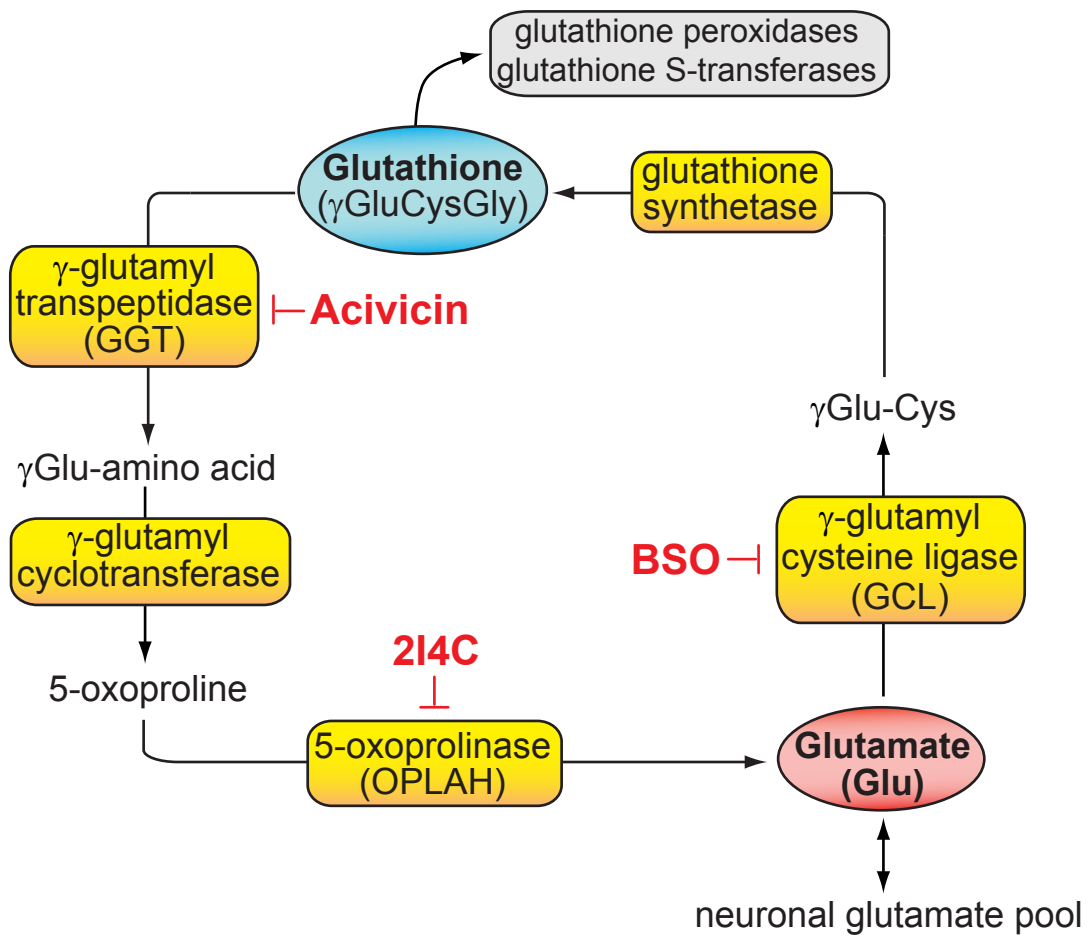

Supplementary Fig. 2 - Expression of glutathione cycle enzymes in HT22 and PC12 cells

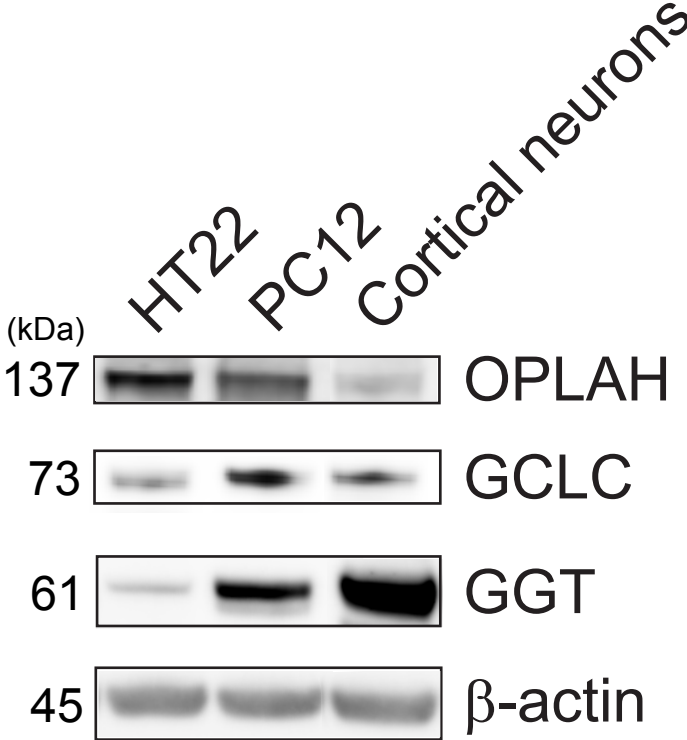

# Supplementary Fig. 3 - Acivicin increases GCLC expression in PC12 cells

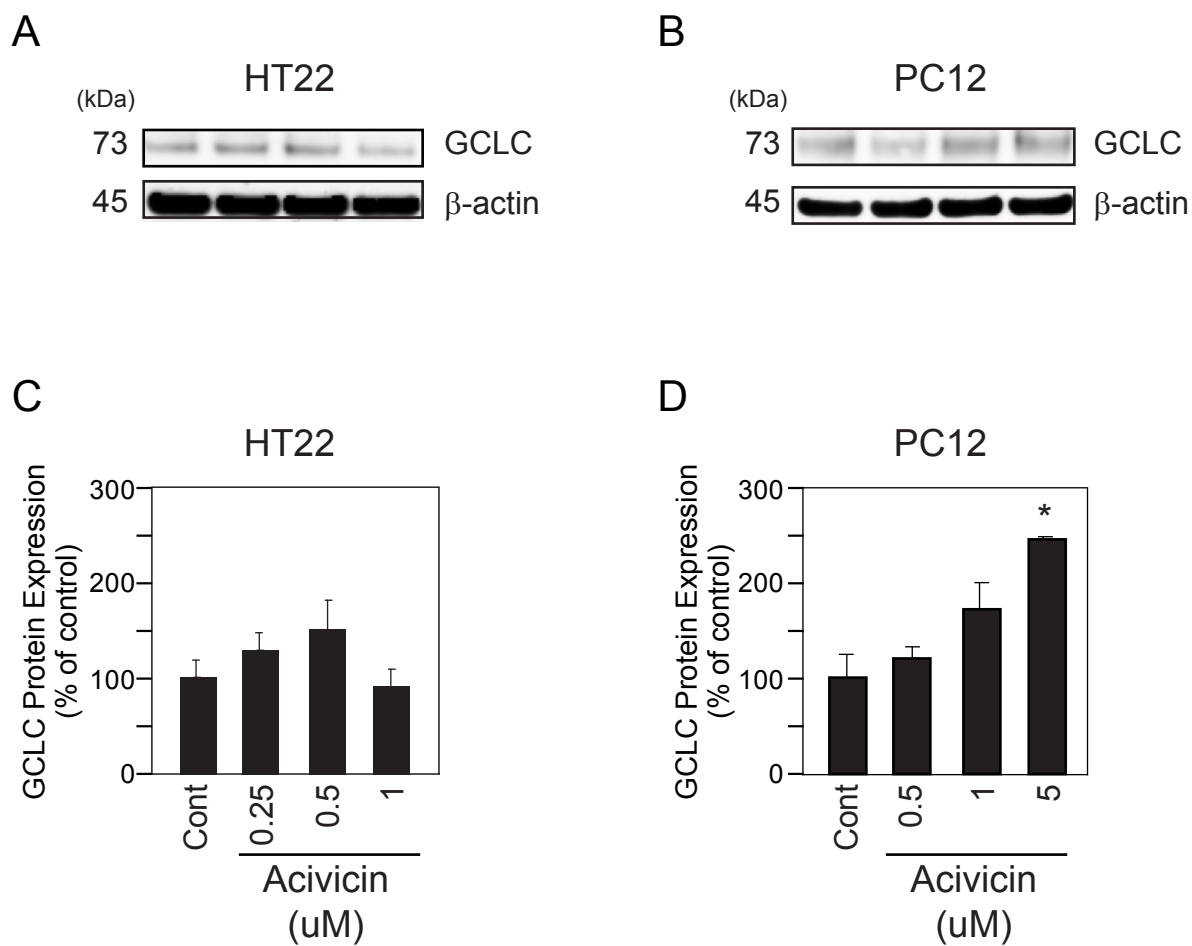

Supplement: NIHMS303241-supplement-01.pdf [file NIHMS303241-supplement-01.pdf]
